# Supplementary material for: Improvements in Critical Thinking Performance Following Mindfulness Meditation Depend on Thinking Dispositions
Source: Springer Nature journal article supplement (doi:10.1007/s12671-017-0789-8), 2017-08-22
Supplement: MOESM1 [file 14226530]

**Supplementary Materials**

**Appendix A - Manipulation Checks**

**Results of Manipulation Checks.**

Table A1 displays the hypotheses related to the manipulation checks carried out for this study and the associated statistical tests conducted. Hypothesis 3.1 stated that state mindfulness would increase significantly more in the MM group in comparison to the SM group following the experimental manipulation. This was tested using a mixed ANOVA to test the interaction between the between-subjects factor, group assignment (MM vs SM), and the within-subjects factor, time (pre-manipulation vs. post-manipulation). While there was a significant main effect of time (*F*(1, 63) = 16.51, *p* =.0002, *η*p2 = .20) which indicated that state mindfulness increased for both groups following the experimental manipulation, there was no significant difference between the groups (*F*(1, 63) = .78, *p* =.38, *η*p2 = .01) and crucially no interaction between group and time *(F*(1, 63) = .70, *p* =.41, *η*p2 = .01).

Hypotheses 3.2 and 3.3 respectively stated that there would be no difference due to group assignment in the extent to which participants reported following and understanding the experimental manipulation instructions. Hypothesis 3.4 stated that there would be no difference due to group assignment in the extent to which participants reported applying the state of attention cultivated during the experimental manipulation to each behavioural task. These hypotheses were tested using Bayesian Independent Samples t-tests with Cauchy prior widths of 1, as recommended by Rouder and colleagues (2009), which were run using JASP. On average the experimental manipulation instructions were followed to a slightly greater but non-significant extent in the MM group (M = 6.29) as compared to the SM group (M = 5.94; *t*(63)=-1.71, *p* = .09). The corresponding Bayes factor (null/alternative; BF01) indicated that the data were 1.43 times more likely under the null hypothesis. No significant difference was found between the MM group (M = 6.45) and the SM group (M = 6.38; *t*(63)=.327, *p* = .74) in terms of understanding of the experimental manipulation instructions. There was support for the acceptance of the null hypothesis as the BF01 indicated that the data were 5.07 times more likely under it than under the alternate hypothesis. Similarly strong support was found for the hypothesis of no difference between the MM group (N-back M = 4.82; HCTA M = 4.94) and the SM (N-back M = 4.84; HCTA M = 4.81) group in the extent to which the attentional state cultivated during the experimental manipulation was applied to each behavioural task (N-back: *t*(63)=.04, *p* = .97, BF01 = 5.32; HCTA: *t*(63)= -.39, *p* = .70, BF01 =

| Table A1. Manipulation Checks |  |  |
| --- | --- | --- |
| Hypothesis | Variables | Test |
| 3.1 Greater increase in mindfulness for experimental group | DV=Mindful Attention and Awareness Scale;  IVs = Time, Group | 2x2 Mixed ANOVA |
| 3.2 No difference in adherence to instructions | DV = Following of instructions;  IV = Group | Bayesian Independent T-test |
| 3.3 No difference in understanding of instructions | DV = Understanding of instructions;  IV = Group | Bayesian Independent T-test |
| 3.4 No differences in application of induced attentional state to tasks | DV = Application of induced attentional state to each task;  IV = Group | Bayesian Independent T-test |

4.98).

*Note*. IV = Independent variable, DV = Dependent variable.

**Appendix B – Mediation and Moderation Models**

The following figures present conceptual diagrams of the models involving mediation and moderation which were tested in this study.


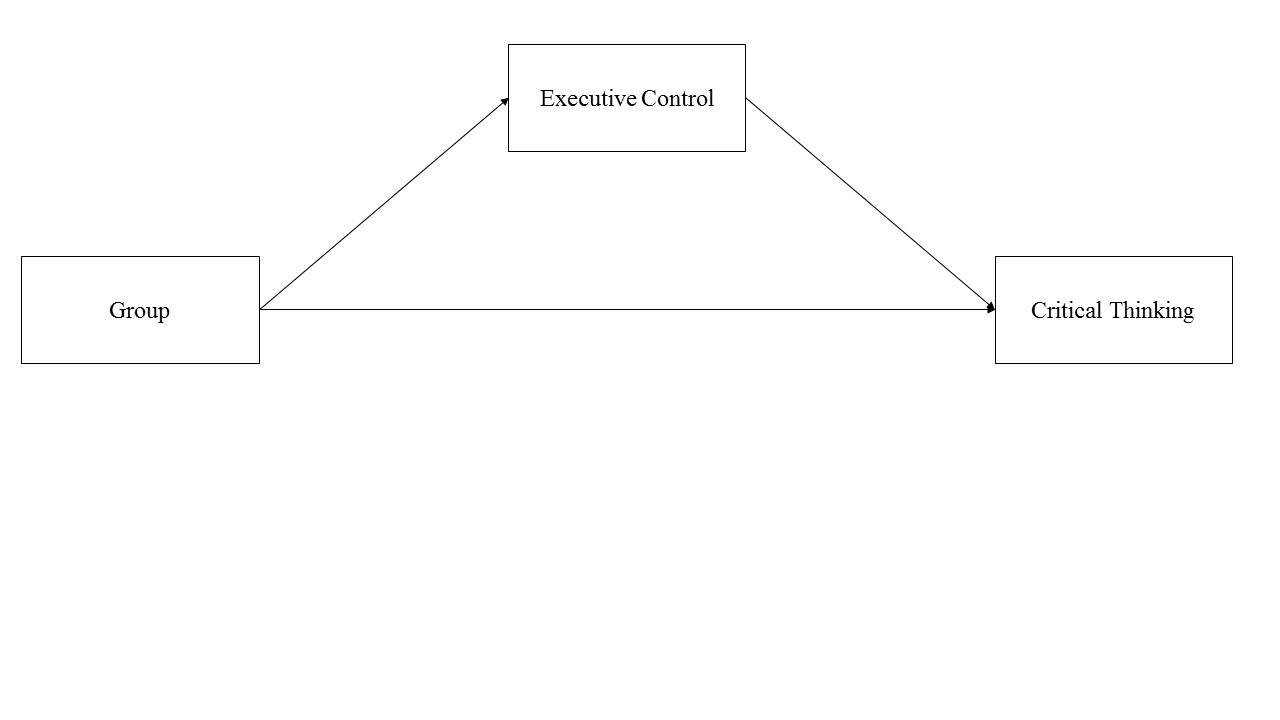


*Figure B1*. Conceptual diagram of Hypothesis 1.3. Process Model 4 was applied in order to test whether executive control mediated the effect of the experimental manipulation on critical thinking.


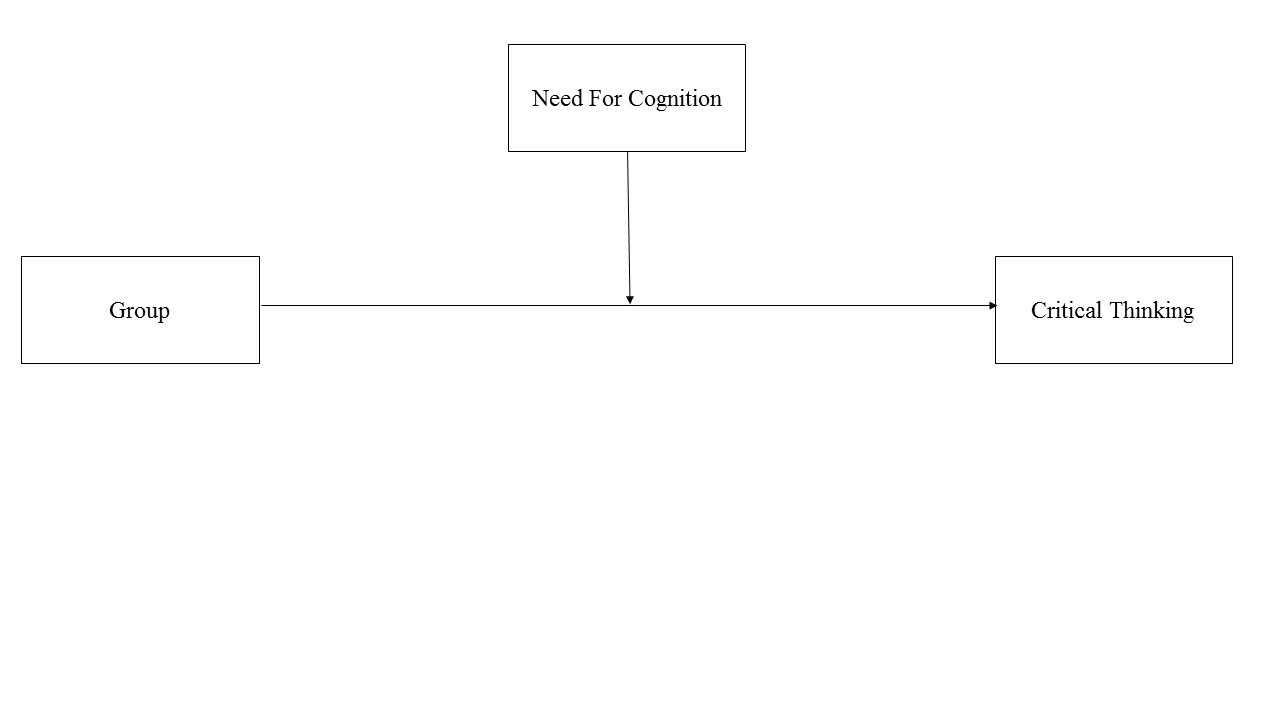


*Figure B2*. Conceptual diagram of Hypothesis 2.1. Process Model 1 was applied in order to test whether any change in critical thinking due to group assignment was moderated by need for cognition.


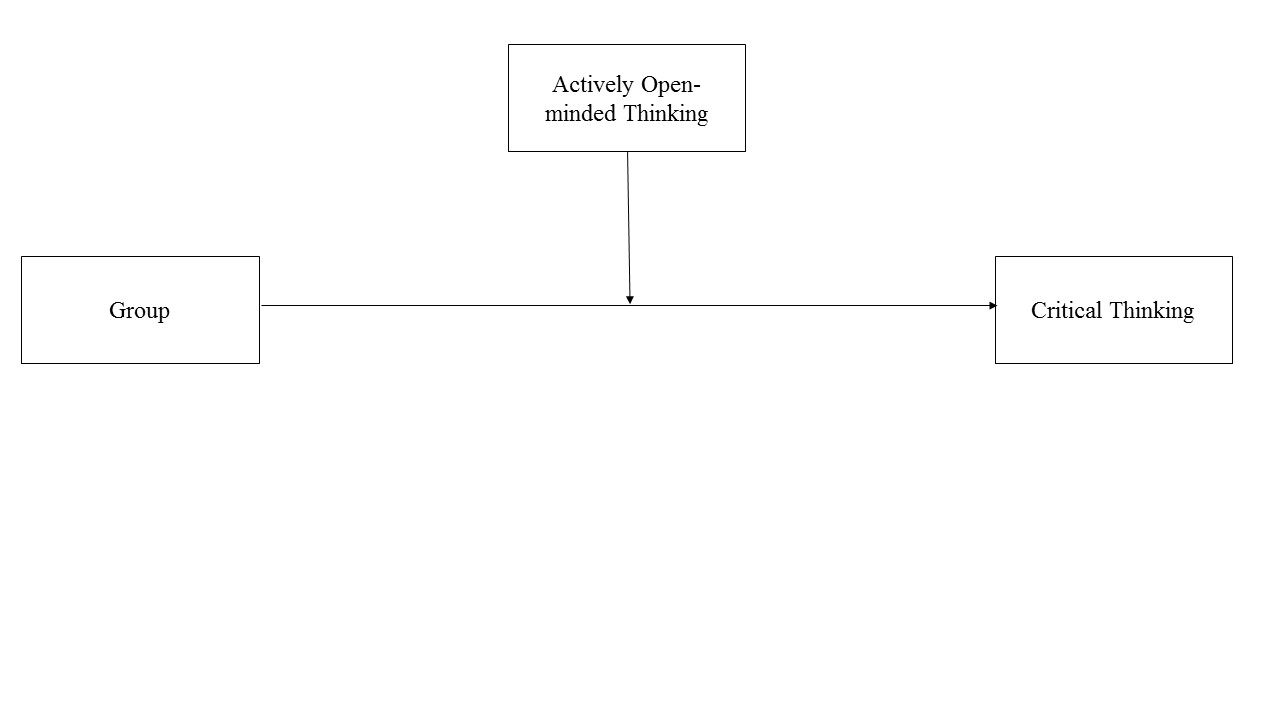


*Figure B3*. Conceptual diagram of Hypothesis 2.2. Process Model 1 was applied in order to test whether any change in critical thinking due to group assignment was moderated by actively open-minded thinking.


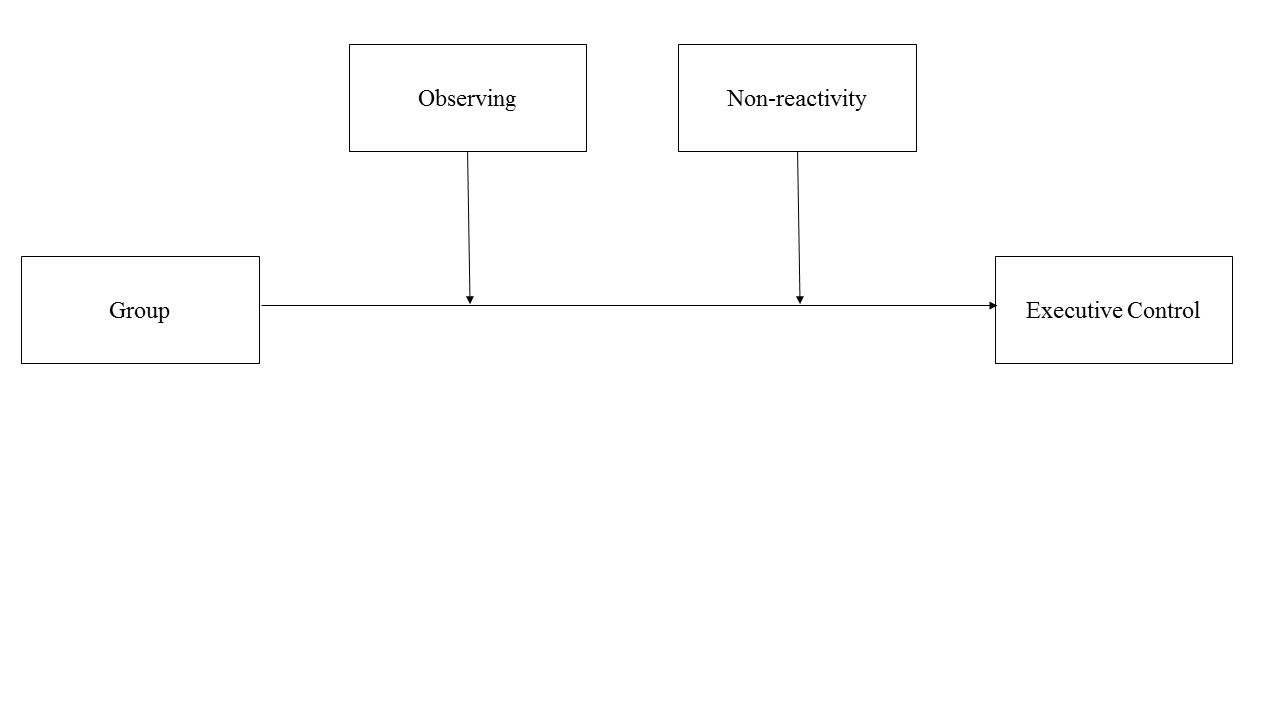


*Figure B4*. Conceptual diagram of Hypothesis 2.3. Process Model 2 was applied in order to test whether any change in executive control due to group assignment was moderated by observing and non-reactivity.


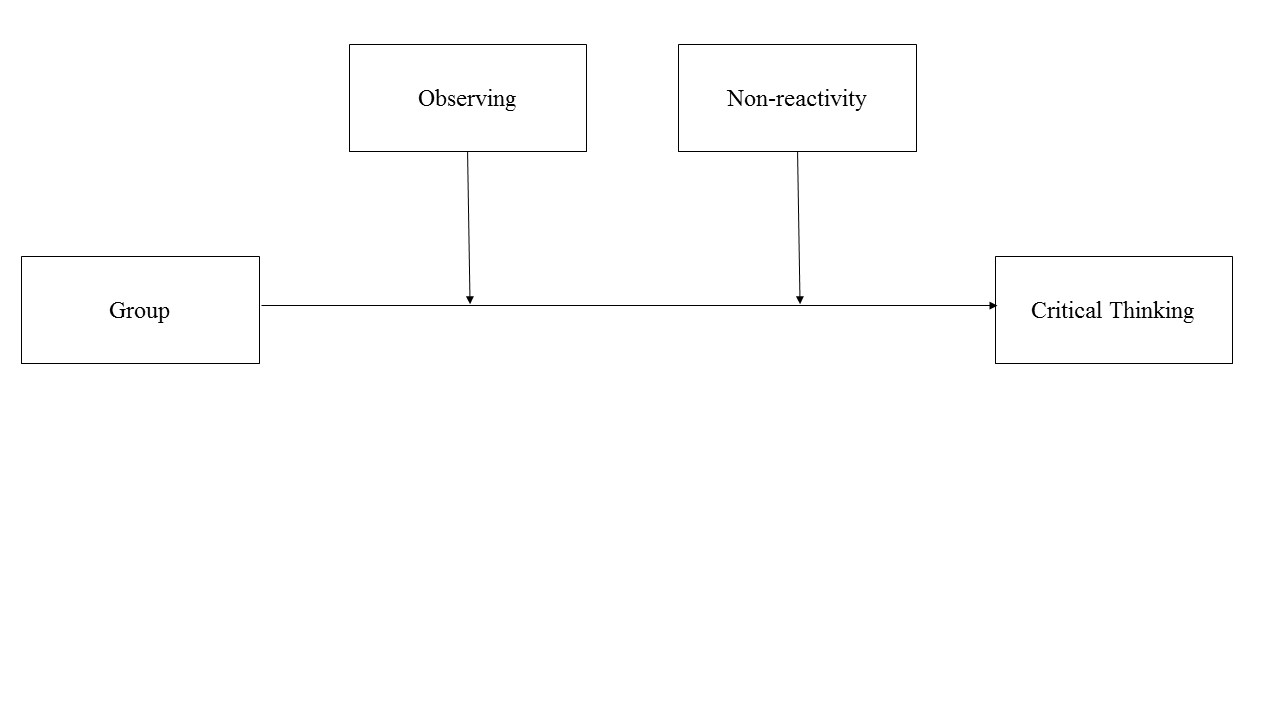


*Figure B5*. Conceptual diagram of Hypothesis 2.4. Process Model 2 was applied in order to test whether any change in critical thinking due to group assignment was moderated by observing and non-reactivity.


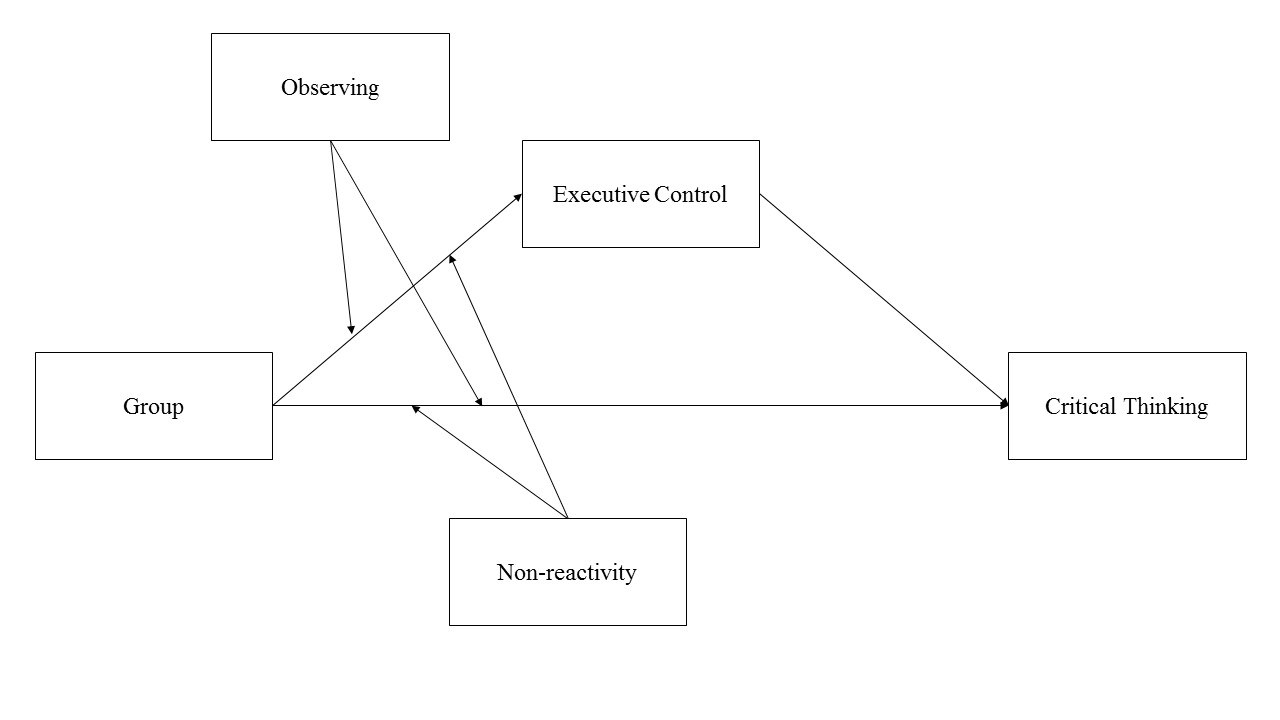


*Figure B6*. Conceptual diagram of Hypothesis 2.5. Process Model 10 was applied in order to test whether the indirect effect of group assignment on critical thinking through executive function was moderated by observing and non-reactivity.
